# Supplementary material
Source: PubMed Central journal article supplement (PMC3905747)
Supplement: NIHMS529650-supplement-12011_2013_9820_MOESM2_ESM.pdf [file NIHMS529650-supplement-12011_2013_9820_MOESM2_ESM.pdf]

**Supplement Table 1. Composition of the four diets**

|              | 1-AIN76A (Control) |       | 2-Control+minerals |       | 3-HFWD |       | 4-HFWD+minerals |       |
|--------------|--------------------|-------|--------------------|-------|--------|-------|-----------------|-------|
|              | gm%                | kcal% | gm%                | kcal% | gm%    | kcal% | gm%             | kcal% |
| Protein      | 20.3               | 20.8  | 19.1               | 20.8  | 24.4   | 20.5  | 22.9            | 20.5  |
| Carbohydrate | 66                 | 67.7  | 66                 | 67.7  | 48.5   | 41.8  | 45.7            | 41.8  |
| Fat          | 5                  | 11.5  | 5                  | 11.5  | 20     | 37.8  | 18.8            | 37.8  |
| Total        | 91.3               | 100   | 86                 | 100   | 92.9   | 100   | 87.5            | 100   |
| kcal/gm      | 3.9                |       | 3.67               |       | 4.76   |       | 4.49            |       |

  

| INGREDIENTS                                          | gm      | kcal | gm      | kcal | gm      | kcal | gm      | kcal |
|------------------------------------------------------|---------|------|---------|------|---------|------|---------|------|
| Casein (80 Mesh) <sup>a</sup>                        | 200     | 800  | 200     | 800  | 240     | 960  | 240     | 960  |
| DL-Methionine                                        | 3       | 12   | 3       | 12   | 0       | 0    | 0       | 0    |
| L-Cystine                                            | 0       | 0    | 0       | 0    | 3.6     | 14   | 3.6     | 14   |
| Corn starch                                          | 150     | 600  | 150     | 600  | 100     | 400  | 100     | 400  |
| Maltodextrin 10                                      | 0       | 0    | 0       | 0    | 75      | 300  | 75      | 300  |
| Sucrose                                              | 500     | 2000 | 500     | 2000 | 310.418 | 1242 | 310.418 | 1242 |
| Cellulose (BW200)                                    | 50      | 0    | 50      | 0    | 20      | 0    | 20      | 0    |
| Corn oil                                             | 50      | 450  | 50      | 450  | 200     | 1800 | 200     | 1800 |
| Ethoxyquin                                           | 0.01    | 0    | 0.01    | 0    | 0.01    | 0    | 0.01    | 0    |
| Mineral Mix for AIN76A <sup>b</sup>                  | 35      | 0    | 35      | 0    | 0       | 0    | 0       | 0    |
| Mineral Mix (without Calcium Phosphate) <sup>c</sup> | 0       | 0    | 0       | 0    | 21      | 0    | 21      | 0    |
| Monosodium phosphate                                 | 0       | 0    | 0       | 0    | 7.98    | 0    | 7.98    | 0    |
| Monopotassium phosphate                              | 0       | 0    | 0       | 0    | 7.91    | 0    | 7.91    | 0    |
| Calcium carbonate (40% calcium)                      | 0       | 0    | 0       | 0    | 0.88    | 0    | 0.88    | 0    |
| Mineral supplement (12% calcium)                     | 0       | 0    | 62      | 0    | 0       | 0    | 62      | 0    |
| Vitamin Mix for AIN76A                               | 10      | 40   | 10      | 40   | 0       | 0    | 0       | 0    |
| Vitamin Mix (without Vit. D3 or Folic Acid)          | 0       | 0    | 0       | 0    | 12      | 48   | 12      | 48   |
| Choline bitartrate                                   | 2       | 0    | 2       | 0    | 1.2     | 0    | 1.2     | 0    |
| Folic acid                                           | 0       | 0    | 0       | 0    | 0.00023 | 0    | 0.00023 | 0    |
| Vitamin D3 (100,000 IU/g)                            | 0       | 0    | 0       | 0    | 0.0012  | 0    | 0.0012  | 0    |
| <b>TOTAL</b>                                         | 1000.01 | 3902 | 1062.06 | 3902 | 1000.05 | 4764 | 1062.05 | 4764 |

<sup>a</sup>Amount of essential minerals in Casein added to all diets (amount per 100 gm of Casein): calcium (25 mg), magnesium (2 mg), copper (0.01 mg), Iron (0.4 mg), manganese (0.014 mg), potassium (2.5 mg), selenium (0.03 mg), sodium (5.2 mg), zinc (4.2mg).

<sup>b</sup>Amount of essential minerals in mineral mix for low fat diets with/without mineral supplement (used at 35 gm/kg diet): calcium (5.2 gm), magnesium (0.5 gm), chromium (2 mg), copper (6 mg), Iron (45 mg), manganese (59 mg), potassium (3.6 g ), selenium (0.16 mg), sodium (1.0 gm), zinc (29 mg).

<sup>c</sup>Amount of essential minerals in mineral mix for western-style diets with/without mineral supplement (used at 21 gm/kg): magnesium (0.6 gm), chromium (2.4 mg), copper (7.2 mg), Iron (54 mg), manganese (71 mg), potassium (4.3 g ), selenium (0.19 mg), sodium (1.2 gm), zinc (35 mg).

*Diets were formulated by Research Diets Incorporated (New Brunswick, NJ).*

**Supplement Table 2. Minerals concentration in diets (mg/kg)  
(as present in the diets from all sources)**

| <b>Mineral</b>   | <b>Control</b> | <b>Control+Minerals</b> | <b>HFWD</b> | <b>HFWD+Minerals</b> |
|------------------|----------------|-------------------------|-------------|----------------------|
| <b>Calcium</b>   | 5250           | 11950                   | 410         | 7360                 |
| <b>Magnesium</b> | 504            | 1362                    | 605         | 1457                 |
| <b>Sodium</b>    | 1010           | 1088                    | 1212        | 1279                 |
| <b>Potassium</b> | 3605           | 3402                    | 4326        | 4081                 |
| <b>Copper</b>    | 6.02           | 5.74                    | 7.2         | 6.9                  |
| <b>Chromium</b>  | 2              | 1.93                    | 2.4         | 2.3                  |
| <b>Iron</b>      | 46             | 53                      | 55          | 61                   |
| <b>Manganese</b> | 59             | 58                      | 71          | 69                   |
| <b>Selenium</b>  | 0.22           | 0.44                    | 0.26        | 0.48                 |
| <b>Strontium</b> | <0.05          | 40                      | <0.05       | 40                   |
| <b>Zinc</b>      | 37             | 36                      | 45          | 43                   |

*Diets were formulated and mineral calculations were provided by Research Diets Incorporated (New Brunswick, NJ).*

**Supplement Table 3. Average weight by diet group at 5, 12 and 18 months**

| Group              | Weight (gm) |           |           |
|--------------------|-------------|-----------|-----------|
|                    | 5 months    | 12 months | 18 months |
| Control            | 25 ± 2      | 33 ± 2    | 35 ± 4    |
| Control + minerals | 24 ± 2      | 31 ± 5    | 32 ± 5    |
| HFWD               | 28 ± 5      | 46 ± 6    | 47 ± 6    |
| HFWD + minerals    | 31 ± 4      | 44 ± 8    | 49 ± 7    |

Values are means and standard deviations. Zero time (3 weeks of age) average weight was 14.5±1 gm.

**Supplement Table 4.** Micro-CT analysis of cortical and trabecular regions of femora from **female** mice in four diet groups at **five** months

|                                                             | CONTROL       | CONTROL +<br>minerals      | HFWD          | HFWD +<br>minerals            |
|-------------------------------------------------------------|---------------|----------------------------|---------------|-------------------------------|
| <b>Cortical</b>                                             |               |                            |               |                               |
| Bone mineral content (mg)                                   | 3.9 ± 0.2     | 4.2 ± 0.2 <sup>c</sup>     | 3.6 ± 0.3     | 4.0 ± 0.2 <sup>a</sup>        |
| Bone mineral density (mg/cc)                                | 347 ± 16      | 378 ± 25 <sup>c</sup>      | 314 ± 36      | 339 ± 16                      |
| Tissue mineral density (mg/cc)                              | 1136 ± 24     | 1140 ± 12                  | 1030 ± 77     | 1123 ± 15 <sup>a</sup>        |
| Mean thickness (mm)                                         | 0.215 ± 0.007 | 0.225 ± 0.007 <sup>c</sup> | 0.188 ± 0.030 | 0.225 ± 0.008 <sup>a, b</sup> |
| Polar moment of inertia (mm <sup>4</sup> )                  | 0.133 ± 0.008 | 0.147 ± 0.011              | 0.142 ± 0.024 | 0.147 ± 0.013                 |
| Endosteal perimeter (mm)                                    | 3.6 ± 0.2     | 3.8 ± 0.1                  | 3.9 ± 0.2     | 3.7 ± 0.1 <sup>a</sup>        |
| Periosteal perimeter (mm)                                   | 5.0 ± 0.2     | 5.2 ± 0.2                  | 5.1 ± 0.3     | 5.1 ± 0.1                     |
| Marrow area (mm <sup>2</sup> )                              | 0.90 ± 0.07   | 0.94 ± 0.06                | 1.07 ± 0.12   | 0.94 ± 0.07 <sup>a</sup>      |
| Cross sectional area (mm <sup>2</sup> )                     | 0.86 ± 0.02   | 0.92 ± 0.03 <sup>c</sup>   | 0.79 ± 0.13   | 0.92 ± 0.02 <sup>a, b</sup>   |
| Total area (mm <sup>2</sup> )                               | 1.76 ± 0.07   | 1.85 ± 0.08                | 1.86 ± 0.16   | 1.86 ± 0.06                   |
| <b>Trabecular</b>                                           |               |                            |               |                               |
| Bone mineral content (mg)                                   | 0.51 ± 0.04   | 0.74 ± 0.06 <sup>c</sup>   | 0.59 ± 0.15   | 0.65 ± 0.05 <sup>b</sup>      |
| Bone mineral density (mg/cc)                                | 156 ± 12      | 234 ± 15 <sup>c</sup>      | 164 ± 54      | 201 ± 11 <sup>a, b</sup>      |
| Tissue mineral density (mg/cc)                              | 577 ± 55      | 596 ± 30                   | 527 ± 20      | 581 ± 13 <sup>a</sup>         |
| Bone volume fraction (mm <sup>3</sup> /mm <sup>3</sup> )    | 0.05 ± 0.01   | 0.13 ± 0.02 <sup>c</sup>   | 0.05 ± 0.01   | 0.10 ± 0.02 <sup>a, b</sup>   |
| Surface to volume ratio (mm <sup>2</sup> /mm <sup>3</sup> ) | 60.0 ± 10.0   | 49.6 ± 3.7 <sup>c</sup>    | 55.6 ± 3.5    | 49.6 ± 4.0 <sup>a, b</sup>    |
| Trabecular thickness (mm)                                   | 0.034 ± 0.007 | 0.041 ± 0.003 <sup>c</sup> | 0.036 ± 0.002 | 0.041 ± 0.003 <sup>a, b</sup> |
| Trabecular number (1/mm)                                    | 1.36 ± 0.25   | 3.30 ± 0.28 <sup>c</sup>   | 1.47 ± 0.29   | 2.50 ± 0.31 <sup>a, b</sup>   |
| Trabecular spacing (mm)                                     | 0.67 ± 0.09   | 0.26 ± 0.03 <sup>c</sup>   | 0.66 ± 0.12   | 0.37 ± 0.06 <sup>a, b</sup>   |

Each femur was subjected to micro-CT at two ROIs—cortical (mid-diaphysis) and trabecular (distal metaphysis). With each bone, ten cortical parameters and eight trabecular parameters were assessed. Values are means and standard deviations. Statistical significance was determined by ANOVA followed by paired group comparisons. “a” and “b” are placed on the HFWD+minerals group: “a” shows statistically significant improvement relative to the HFWD group, “b” shows statistically significant improvement relative to CONTROL; “c” is placed on the CONTROL+minerals group, and shows significant improvement relative to the CONTROL (p <0.05). Data are based on 10 female mice in each diet group at 5 months.

**Supplement Table 5.** Micro-CT analysis of cortical and trabecular regions of femora from **female** mice in four diet groups at **twelve** months

|                                                             | CONTROL       | CONTROL +<br>minerals      | HFWD          | HFWD +<br>minerals          |
|-------------------------------------------------------------|---------------|----------------------------|---------------|-----------------------------|
| <b>Cortical</b>                                             |               |                            |               |                             |
| Bone mineral content (mg)                                   | 4.1 ± 0.2     | 4.4 ± 0.4                  | 4.1 ± 0.3     | 4.6 ± 0.3 <sup>a, b</sup>   |
| Bone mineral density (mg/cc)                                | 309 ± 36      | 302 ± 31                   | 287 ± 30      | 322 ± 21                    |
| Tissue mineral density (mg/cc)                              | 1129 ± 14     | 1119 ± 23                  | 1060 ± 13     | 1105 ± 18 <sup>a, b</sup>   |
| Mean thickness (mm)                                         | 0.210 ± 0.011 | 0.218 ± 0.019              | 0.199 ± 0.010 | 0.218 ± 0.014 <sup>a</sup>  |
| Polar moment of inertia (mm <sup>4</sup> )                  | 0.152 ± 0.013 | 0.173 ± 0.017 <sup>c</sup> | 0.190 ± 0.036 | 0.188 ± 0.015 <sup>b</sup>  |
| Endosteal perimeter (mm)                                    | 3.8 ± 0.1     | 4.0 ± 0.2 <sup>c</sup>     | 4.2 ± 0.2     | 4.1 ± 0.2 <sup>b</sup>      |
| Periosteal perimeter (mm)                                   | 5.0 ± 0.1     | 5.3 ± 0.1 <sup>c</sup>     | 5.5 ± 0.4     | 5.5 ± 0.2 <sup>b</sup>      |
| Marrow area (mm <sup>2</sup> )                              | 1.01 ± 0.07   | 1.10 ± 0.11 <sup>c</sup>   | 1.28 ± 0.10   | 1.16 ± 0.09 <sup>a, b</sup> |
| Cross sectional area (mm <sup>2</sup> )                     | 0.87 ± 0.04   | 0.94 ± 0.08 <sup>c</sup>   | 0.91 ± 0.07   | 0.96 ± 0.06 <sup>b</sup>    |
| Total area (mm <sup>2</sup> )                               | 1.88 ± 0.07   | 2.03 ± 0.10 <sup>c</sup>   | 2.19 ± 0.16   | 2.12 ± 0.10 <sup>b</sup>    |
| <b>Trabecular</b>                                           |               |                            |               |                             |
| Bone mineral content (mg)                                   | 0.44 ± 0.07   | 0.53 ± 0.09 <sup>c</sup>   | 0.58 ± 0.04   | 0.64 ± 0.07 <sup>a, b</sup> |
| Bone mineral density (mg/cc)                                | 131 ± 21      | 158 ± 35                   | 146 ± 11      | 171 ± 18 <sup>a, b</sup>    |
| Tissue mineral density (mg/cc)                              | 598 ± 30      | 587 ± 22                   | 564 ± 33      | 569 ± 22 <sup>b</sup>       |
| Bone volume fraction (mm <sup>3</sup> /mm <sup>3</sup> )    | 0.02 ± 0.01   | 0.05 ± 0.03 <sup>c</sup>   | 0.04 ± 0.01   | 0.06 ± 0.02 <sup>a, b</sup> |
| Surface to volume ratio (mm <sup>2</sup> /mm <sup>3</sup> ) | 60.1 ± 7.1    | 50.8 ± 4.8 <sup>c</sup>    | 53.8 ± 8.7    | 53.5 ± 5.0 <sup>b</sup>     |
| Trabecular thickness (mm)                                   | 0.034 ± 0.004 | 0.040 ± 0.004 <sup>c</sup> | 0.038 ± 0.005 | 0.038 ± 0.004 <sup>b</sup>  |
| Trabecular number (1/mm)                                    | 0.52 ± 0.16   | 1.25 ± 0.67 <sup>c</sup>   | 1.01 ± 0.30   | 1.49 ± 0.47 <sup>a, b</sup> |
| Trabecular spacing (mm)                                     | 2.13 ± 0.84   | 1.08 ± 0.81 <sup>c</sup>   | 1.04 ± 0.36   | 0.69 ± 0.21 <sup>a, b</sup> |

Each femur was subjected to micro-CT at two ROIs—cortical (mid-diaphysis) and trabecular (distal metaphysis). With each bone, ten cortical parameters and eight trabecular parameters were assessed. Values are means and standard deviations. Statistical significance was determined by ANOVA followed by paired group comparisons. “a” and “b” are placed on the HFWD+minerals group: “a” shows statistically significant improvement relative to the HFWD group, “b” shows statistically significant improvement relative to CONTROL; “c” is placed on the CONTROL+minerals group, and shows significant improvement relative to the CONTROL (p <0.05). Data are based on 10 female mice in each diet group at 12 months.

**Supplement Table 6.** Micro-CT analysis of cortical and trabecular regions of femora from **female** mice in four diet groups at **eighteen** months

|                                                             | CONTROL       | CONTROL +<br>minerals      | HFWD          | HFWD +<br>minerals          |
|-------------------------------------------------------------|---------------|----------------------------|---------------|-----------------------------|
| <b>Cortical</b>                                             |               |                            |               |                             |
| Bone mineral content (mg)                                   | 4.0 ± 0.4     | 4.4 ± 0.5 <sup>c</sup>     | 3.6 ± 0.4     | 4.5 ± 0.6 <sup>a, b</sup>   |
| Bone mineral density (mg/cc)                                | 303 ± 27      | 299 ± 28                   | 260 ± 34      | 322 ± 47 <sup>a</sup>       |
| Tissue mineral density (mg/cc)                              | 1105 ± 25     | 1132 ± 29 <sup>c</sup>     | 1076 ± 33     | 1140 ± 41 <sup>a, b</sup>   |
| Mean thickness (mm)                                         | 0.201 ± 0.034 | 0.191 ± 0.017              | 0.159 ± 0.014 | 0.205 ± 0.022 <sup>a</sup>  |
| Polar moment of inertia (mm <sup>4</sup> )                  | 0.181 ± 0.019 | 0.204 ± 0.030 <sup>c</sup> | 0.195 ± 0.030 | 0.213 ± 0.029 <sup>b</sup>  |
| Endosteal perimeter (mm)                                    | 4.1 ± 0.2     | 4.4 ± 0.1 <sup>c</sup>     | 4.7 ± 0.2     | 4.4 ± 0.2 <sup>a, b</sup>   |
| Periosteal perimeter (mm)                                   | 5.4 ± 0.2     | 5.5 ± 0.2 <sup>c</sup>     | 5.7 ± 0.2     | 5.6 ± 0.2 <sup>b</sup>      |
| Marrow area (mm <sup>2</sup> )                              | 1.20 ± 0.17   | 1.37 ± 0.11 <sup>c</sup>   | 1.63 ± 0.14   | 1.40 ± 0.16 <sup>a, b</sup> |
| Cross sectional area (mm <sup>2</sup> )                     | 0.88 ± 0.09   | 0.89 ± 0.08                | 0.79 ± 0.08   | 0.93 ± 0.13 <sup>a</sup>    |
| Total area (mm <sup>2</sup> )                               | 2.08 ± 0.12   | 2.26 ± 0.13 <sup>c</sup>   | 2.42 ± 0.18   | 2.33 ± 0.14 <sup>b</sup>    |
| <b>Trabecular</b>                                           |               |                            |               |                             |
| Bone mineral content (mg)                                   | 0.43 ± 0.13   | 0.50 ± 0.11                | 0.34 ± 0.14   | 0.44 ± 0.09 <sup>a</sup>    |
| Bone mineral density (mg/cc)                                | 120 ± 38      | 142 ± 40                   | 79 ± 29       | 143 ± 30 <sup>a</sup>       |
| Tissue mineral density (mg/cc)                              | 556 ± 70      | 645 ± 24 <sup>c</sup>      | 604 ± 38      | 610 ± 40 <sup>b</sup>       |
| Bone volume fraction (mm <sup>3</sup> /mm <sup>3</sup> )    | 0.01 ± 0.01   | 0.04 ± 0.03 <sup>c</sup>   | 0.02 ± 0.01   | 0.03 ± 0.02 <sup>b</sup>    |
| Surface to volume ratio (mm <sup>2</sup> /mm <sup>3</sup> ) | 62.2 ± 15.7   | 47.6 ± 7.1 <sup>c</sup>    | 57.8 ± 10.2   | 54.7 ± 8.9                  |
| Trabecular thickness (mm)                                   | 0.033 ± 0.010 | 0.043 ± 0.007 <sup>c</sup> | 0.036 ± 0.008 | 0.038 ± 0.008               |
| Trabecular number (1/mm)                                    | 0.33 ± 0.24   | 0.93 ± 0.73 <sup>c</sup>   | 0.52 ± 0.27   | 0.85 ± 0.73 <sup>b</sup>    |
| Trabecular spacing (mm)                                     | 2.62 ± 1.25   | 1.70 ± 1.21                | 3.23 ± 3.27   | 1.42 ± 0.59 <sup>a, b</sup> |

Each femur was subjected to micro-CT at two ROIs—cortical (mid-diaphysis) and trabecular (distal metaphysis). With each bone, ten cortical parameters and eight trabecular parameters were assessed. Values are means and standard deviations. Statistical significance was determined by ANOVA followed by paired group comparisons. “a” and “b” are placed on the HFWD+minerals group: “a” shows statistically significant improvement relative to the HFWD group, “b” shows statistically significant improvement relative to CONTROL; “c” is placed on the CONTROL+minerals group, and shows significant improvement relative to the CONTROL (p < 0.05). Data are based on 15 female mice in each diet group at 18 months.

**Supplement Table 7.** Micro-CT analysis of cortical and trabecular regions of C8 vertebrae from **female** mice in four diet groups at **twelve** months

|                                                             | CONTROL     | CONTROL +<br>minerals    | HFWD        | HFWD +<br>minerals          |
|-------------------------------------------------------------|-------------|--------------------------|-------------|-----------------------------|
| <b>Cortical</b>                                             |             |                          |             |                             |
| Bone mineral content (mg)                                   | 0.44 ± 0.05 | 0.43 ± 0.03              | 0.34 ± 0.03 | 0.43 ± 0.03 <sup>a</sup>    |
| Bone mineral density (mg/cc)                                | 961 ± 30    | 942 ± 14                 | 731 ± 25    | 941 ± 33 <sup>a</sup>       |
| Tissue mineral content (mg)                                 | 0.41 ± 0.05 | 0.41 ± 0.03              | 0.30 ± 0.03 | 0.40 ± 0.03 <sup>a</sup>    |
| Tissue mineral density (mg/cc)                              | 1056 ± 23   | 1050 ± 15                | 962 ± 13    | 1044 ± 25 <sup>a</sup>      |
| Mean thickness (mm)                                         | 0.31 ± 0.04 | 0.27 ± 0.01              | 0.22 ± 0.02 | 0.28 ± 0.04 <sup>a</sup>    |
| Inner perimeter (mm)                                        | 2.38 ± 0.28 | 2.86 ± 0.14 <sup>c</sup> | 2.68 ± 0.14 | 2.70 ± 0.33                 |
| Outer perimeter (mm)                                        | 5.05 ± 0.38 | 5.31 ± 0.22              | 5.22 ± 0.31 | 5.28 ± 0.28                 |
| Marrow area (mm <sup>2</sup> )                              | 0.39 ± 0.09 | 0.52 ± 0.04 <sup>c</sup> | 0.51 ± 0.06 | 0.48 ± 0.12                 |
| Cortical area (mm <sup>2</sup> )                            | 0.97 ± 0.11 | 0.92 ± 0.06              | 0.73 ± 0.06 | 0.95 ± 0.09 <sup>a</sup>    |
| Total Area (mm <sup>2</sup> )                               | 1.36 ± 0.09 | 1.45 ± 0.09              | 1.24 ± 0.05 | 1.43 ± 0.06 <sup>a</sup>    |
| Volume (mm <sup>3</sup> )                                   | 0.46 ± 0.05 | 0.46 ± 0.02              | 0.47 ± 0.03 | 0.46 ± 0.02                 |
| Volume of bone (mm <sup>3</sup> )                           | 0.39 ± 0.05 | 0.39 ± 0.02              | 0.31 ± 0.02 | 0.38 ± 0.02 <sup>a</sup>    |
| <b>Trabecular</b>                                           |             |                          |             |                             |
| Bone mineral content (mg)                                   | 0.40 ± 0.07 | 0.55 ± 0.08 <sup>c</sup> | 0.30 ± 0.03 | 0.40 ± 0.06 <sup>a</sup>    |
| Bone mineral density (mg/cc)                                | 619 ± 63    | 737 ± 83 <sup>c</sup>    | 482 ± 34    | 687 ± 107 <sup>a</sup>      |
| Tissue mineral content (mg)                                 | 0.36 ± 0.08 | 0.51 ± 0.09 <sup>c</sup> | 0.25 ± 0.03 | 0.38 ± 0.07 <sup>a</sup>    |
| Tissue mineral density (mg/cc)                              | 808 ± 28    | 858 ± 49                 | 711 ± 15    | 794 ± 45 <sup>a</sup>       |
| Bone volume fraction (mm <sup>3</sup> /mm <sup>3</sup> )    | 0.67 ± 0.07 | 0.79 ± 0.08 <sup>c</sup> | 0.56 ± 0.05 | 0.80 ± 0.14 <sup>a</sup>    |
| Surface to volume ratio (mm <sup>2</sup> /mm <sup>3</sup> ) | 17.3 ± 2.7  | 13.1 ± 3.3 <sup>c</sup>  | 20.1 ± 3.0  | 14.8 ± 6.3                  |
| Trabecular thickness (mm)                                   | 0.12 ± 0.02 | 0.16 ± 0.04 <sup>c</sup> | 0.10 ± 0.02 | 0.15 ± 0.05 <sup>a</sup>    |
| Trabecular number (1/mm)                                    | 5.7 ± 0.3   | 5.1 ± 0.8                | 5.6 ± 0.8   | 5.5 ± 1.1                   |
| Trabecular spacing (mm)                                     | 0.06 ± 0.01 | 0.04 ± 0.01 <sup>c</sup> | 0.08 ± 0.02 | 0.03 ± 0.02 <sup>a, b</sup> |
| Volume (mm <sup>3</sup> )                                   | 0.65 ± 0.07 | 0.75 ± 0.05 <sup>c</sup> | 0.62 ± 0.03 | 0.59 ± 0.04                 |
| Volume of bone (mm <sup>3</sup> )                           | 0.44 ± 0.08 | 0.60 ± 0.07 <sup>c</sup> | 0.35 ± 0.04 | 0.47 ± 0.07 <sup>a</sup>    |

Each C8 vertebra (from a subset) was subjected to micro-CT at two ROIs—cortical (middle isosurface) and trabecular (cranial isosurface). With each vertebra, twelve cortical parameters and eleven trabecular parameters were assessed. Values are means and standard deviations. Statistical significance was determined by ANOVA followed by paired group comparisons. “a” and “b” are placed on the HFWD+minerals group: “a” shows statistically significant improvement relative to the HFWD group, “b” shows statistically significant improvement relative to CONTROL; “c” is placed on the CONTROL+minerals group, and shows significant improvement relative to the CONTROL ( $p < 0.05$ ). Vertebral data are based on 6 female mice at 12 months in each diet group.

**Supplement Table 8.** Micro-CT analysis of cortical and trabecular regions of C8 vertebrae from **female** mice in two diet groups at **eighteen** months

|                                                             | HFWD        | HFWD +<br>minerals       |
|-------------------------------------------------------------|-------------|--------------------------|
| <b>Cortical</b>                                             |             |                          |
| Bone mineral content (mg)                                   | 0.32 ± 0.03 | 0.39 ± 0.06 <sup>a</sup> |
| Bone mineral density (mg/cc)                                | 763 ± 146   | 928 ± 43                 |
| Tissue mineral content (mg)                                 | 0.28 ± 0.03 | 0.36 ± 0.06 <sup>a</sup> |
| Tissue mineral density (mg/cc)                              | 960 ± 74    | 1028 ± 47                |
| Mean thickness (mm)                                         | 0.21 ± 0.04 | 0.25 ± 0.06              |
| Inner perimeter (mm)                                        | 2.78 ± 0.31 | 2.48 ± 0.24              |
| Outer perimeter (mm)                                        | 4.91 ± 0.25 | 4.90 ± 0.41              |
| Marrow area (mm <sup>2</sup> )                              | 0.54 ± 0.14 | 0.41 ± 0.06              |
| Cortical area (mm <sup>2</sup> )                            | 0.62 ± 0.04 | 0.86 ± 0.10 <sup>a</sup> |
| Total area (mm <sup>2</sup> )                               | 1.16 ± 0.15 | 1.27 ± 0.12              |
| Volume (mm <sup>3</sup> )                                   | 0.43 ± 0.07 | 0.41 ± 0.05              |
| Volume of bone (mm <sup>3</sup> )                           | 0.29 ± 0.02 | 0.35 ± 0.04 <sup>a</sup> |
| <b>Trabecular</b>                                           |             |                          |
| Bone mineral content (mg)                                   | 0.32 ± 0.04 | 0.42 ± 0.07              |
| Bone mineral density (mg/cc)                                | 452 ± 46    | 659 ± 108 <sup>a</sup>   |
| Tissue mineral content (mg)                                 | 0.25 ± 0.04 | 0.37 ± 0.07 <sup>a</sup> |
| Tissue mineral density (mg/cc)                              | 768 ± 46    | 846 ± 58                 |
| Bone volume fraction (mm <sup>3</sup> /mm <sup>3</sup> )    | 0.47 ± 0.05 | 0.69 ± 0.10 <sup>a</sup> |
| Surface to volume ratio (mm <sup>2</sup> /mm <sup>3</sup> ) | 21.9 ± 2.7  | 15.1 ± 3.4 <sup>a</sup>  |
| Trabecular thickness (mm)                                   | 0.09 ± 0.01 | 0.14 ± 0.03 <sup>a</sup> |
| Trabecular number (1/mm)                                    | 5.0 ± 0.3   | 5.0 ± 0.5                |
| Trabecular spacing (mm)                                     | 0.11 ± 0.01 | 0.06 ± 0.02 <sup>a</sup> |
| Volume (mm <sup>3</sup> )                                   | 0.70 ± 0.05 | 0.64 ± 0.07              |
| Volume of bone (mm <sup>3</sup> )                           | 0.33 ± 0.04 | 0.44 ± 0.07              |

Each C8 vertebra (from a subset) was subjected to micro-CT at two ROIs—cortical (middle isosurface) and trabecular (cranial isosurface). With each vertebra, twelve cortical parameters and eleven trabecular parameters were assessed. Values are means and standard deviation. Statistical significance was determined by paired group comparisons (p<0.05). “a” is placed on the HFWD+minerals group: “a” shows statistically significant improvement relative to the HFWD group. Vertebral data are based on 6 female mice each of the two high-fat diets at 18 months.



**Supplement  
Table 9A.**

**Bone Mineral Analysis at 5 months in long  
bones of female mice( $\mu\text{g/g}$ )**

**5 months**

|                   | <b>CONTROL</b> | <b>CONTROL+<br/>minerals</b> | <b>HFWD</b> | <b>HFWD+<br/>minerals</b> |
|-------------------|----------------|------------------------------|-------------|---------------------------|
| <b>Fluoride</b>   | 0.83           | 1.06                         | 0.85        | 0.88                      |
| <b>Barium</b>     | 4.32           | 5.2                          | 7.58        | 3.4                       |
| <b>Boron</b>      | <0.5           | <0.5                         | <0.5        | <0.5                      |
| <b>Calcium</b>    | 207400         | 219900                       | 182600      | 209100                    |
| <b>Copper</b>     | <0.5           | <0.5                         | <0.5        | <0.5                      |
| <b>Iron</b>       | 105            | 81                           | 315         | 100                       |
| <b>Lanthanum</b>  | 0.99           | 0.75                         | 1.2         | 0.66                      |
| <b>Magnesium</b>  | 3232           | 3425                         | 2891        | 3250                      |
| <b>Manganese</b>  | 1.93           | 1.77                         | 6.3         | 1.56                      |
| <b>Phosphorus</b> | 99597          | 105564                       | 88548       | 98629                     |
| <b>Potassium</b>  | 856            | 907                          | 832         | 982                       |
| <b>Selenium</b>   | <0.5           | <0.5                         | <0.5        | <0.5                      |
| <b>Silicon</b>    | 3.1            | <0.5                         | 2.91        | <0.5                      |
| <b>Strontium</b>  | 54.6           | 261                          | 126         | 235                       |
| <b>Zinc</b>       | 129            | 151                          | 246         | 149                       |

---

The long bones (one femur and tibia from each animal in the group) were “pooled” and analyzed for levels of trace metals found in the mineral-rich product to give a single value at each time point. Some of these elements were recorded below detectable levels when their concentration level found below  $0.5\mu\text{g/g}$ . The levels of individual trace elements were determined by Inductively Coupled Plasma Optical Emission Spectrometry (ICP-OES) except Fluoride which was done by AOAC 984.37 assay.

Supplement Table  
9 B

Bone Mineral Analysis at 12 and 18 months in long bones of female mice (µg/g)

|            | <u>12 months</u> |                      |        |                   | <u>18 months</u> |                      |        |                   |
|------------|------------------|----------------------|--------|-------------------|------------------|----------------------|--------|-------------------|
|            | CONTROL          | CONTROL+<br>minerals | HFWD   | HFWD+<br>minerals | CONTROL          | CONTROL+<br>minerals | HFWD   | HFWD+<br>minerals |
| Fluoride   | 6.1              | 8.31                 | 4.9    | 5.86              | 6.35             | 7.06                 | 6.83   | 6.13              |
| Aluminum   | 0.98             | 3.46                 | 2.04   | 2.79              | <0.5             | <0.5                 | <0.5   | <0.5              |
| Antimony   | <0.5             | <0.5                 | <0.5   | <0.5              | <0.5             | <0.5                 | <0.5   | <0.5              |
| Arsenic    | <0.5             | <0.5                 | <0.5   | <0.5              | <0.5             | <0.5                 | <0.5   | <0.5              |
| Barium     | 3.84             | 5.43                 | 5.21   | 3.03              | 3.06             | 3.92                 | 4.45   | 2.41              |
| Beryllium  | <0.5             | <0.5                 | <0.5   | <0.5              | <0.5             | <0.5                 | <0.5   | <0.5              |
| Bismuth    | <0.5             | <0.5                 | 2.62   | <0.5              | <0.5             | <0.5                 | <0.5   | <0.5              |
| Boron      | <0.5             | <0.5                 | <0.5   | <0.5              | <0.5             | <0.5                 | <0.5   | <0.5              |
| Calcium    | 226800           | 234900               | 215900 | 232800            | 221400           | 230300               | 202500 | 222400            |
| Cadmium    | <0.5             | <0.5                 | <0.5   | <0.5              | <0.5             | <0.5                 | <0.5   | <0.5              |
| Chromium   | <0.5             | <0.5                 | <0.5   | <0.5              | <0.5             | <0.5                 | <0.5   | <0.5              |
| Cobalt     | <0.5             | <0.5                 | <0.5   | <0.5              | <0.5             | <0.5                 | <0.5   | <0.5              |
| Copper     | <0.5             | <0.5                 | <0.5   | <0.5              | <0.5             | <0.5                 | <0.5   | <0.5              |
| Iron       | 213              | 120                  | 374    | 113               | 107              | 126                  | 301    | 85.2              |
| Lanthanum  | <0.5             | <0.5                 | 0.58   | <0.5              | <0.5             | <0.5                 | <0.5   | <0.5              |
| Lead       | <0.5             | <0.5                 | <0.5   | <0.5              | <0.5             | 0.95                 | 1.39   | 1.03              |
| Lithium    | 0.52             | 0.89                 | <0.5   | 0.63              | 1.98             | 1.35                 | 0.83   | 0.78              |
| Magnesium  | 3386             | 3671                 | 3258   | 3803              | 3712             | 4122                 | 3324   | 4010              |
| Manganese  | 1.47             | 1.46                 | 3.95   | 1.89              | 1.58             | 1.29                 | 3.47   | 1.24              |
| Mercury    | <0.5             | <0.5                 | <0.5   | <0.5              | <0.5             | <0.5                 | <0.5   | <0.5              |
| Molybdenum | <0.5             | <0.5                 | <0.5   | <0.5              | <0.5             | <0.5                 | <0.5   | <0.5              |
| Nickel     | <0.5             | 0.5                  | <0.5   | <0.5              | <0.5             | <0.5                 | <0.5   | <0.5              |
| Niobium    | <0.5             | <0.5                 | <0.5   | <0.5              | <0.5             | <0.5                 | <0.5   | <0.5              |
| Phosphorus | 118400           | 119800               | 110400 | 116300            | 105500           | 112200               | 97980  | 108400            |
| Potassium  | 897              | 977                  | 1044   | 1153              | 1279             | 1342                 | 1295   | 1595              |
| Selenium   | <0.5             | <0.5                 | <0.5   | <0.5              | <0.5             | <0.5                 | <0.5   | <0.5              |
| Silicon    | 0.57             | <0.5                 | 0.57   | <0.5              | 0.71             | <0.5                 | 0.61   | <0.5              |
| Silver     | <0.5             | <0.5                 | <0.5   | <0.5              | <0.5             | <0.5                 | <0.5   | <0.5              |
| Sodium     | 11890            | 11220                | 11780  | 12500             | 15090            | 15940                | 14460  | 16200             |
| Strontium  | 27.31            | 282                  | 52.3   | 256               | 24.48            | 255                  | 46.64  | 230               |
| Sulfur     | 3297             | 3228                 | 3237   | 3398              | 3153             | 3175                 | 2917   | 3115              |
| Tellurium  | <0.5             | <0.5                 | <0.5   | <0.5              | <0.5             | <0.5                 | <0.5   | <0.5              |
| Thallium   | <0.5             | <0.5                 | <0.5   | <0.5              | <0.5             | <0.5                 | <0.5   | <0.5              |
| Thorium    | <0.5             | <0.5                 | <0.5   | <0.5              | <0.5             | <0.5                 | <0.5   | <0.5              |
| Tin        | <0.5             | <0.5                 | <0.5   | <0.5              | <0.5             | <0.5                 | <0.5   | <0.5              |
| Titanium   | <0.5             | <0.5                 | <0.5   | <0.5              | <0.5             | <0.5                 | <0.5   | <0.5              |
| Tungsten   | <0.5             | 0.566                | <0.5   | <0.5              | <0.5             | <0.5                 | <0.5   | <0.5              |
| Vanadium   | <0.5             | <0.5                 | <0.5   | <0.5              | <0.5             | <0.5                 | <0.5   | <0.5              |
| Yttrium    | <0.5             | <0.5                 | <0.5   | <0.5              | <0.5             | <0.5                 | <0.5   | <0.5              |
| Zinc       | 157              | 197                  | 246    | 191               | 150              | 174                  | 219    | 174               |
| Zirconium  | <0.5             | <0.5                 | <0.5   | <0.5              | <0.5             | <0.5                 | <0.5   | <0.5              |

The long bones (one femur and tibia from each animal in the group) were “pooled” and analyzed for levels of trace metals found in the mineral-rich product to give a single value at each time point. Some of these elements were recorded below detectable levels when their concentration level found below 0.5µg/g. The levels of individual trace elements were determined by Inductively Coupled Plasma Optical Emission Spectrometry (ICP-OES) except Fluoride which was done by AOAC 984.37 assay.
